# Supplementary material for: Alkali metal 5-nitrotetrazolate salts: prospective replacements for service lead(ii) azide in explosive initiators
Source: Royal Society of Chemistry journal article supplement (doi:10.1039/b811410b), 2008-01-01
Supplement: b811410b.pdf [file b811410b.pdf]

**Electronic Supplementary information (ESI)**

**Table S1.** Strong and medium strength hydrogen bond geometric parameters for compound **1**.

| D–H⋯A                    | D–H (Å) | H⋯A (Å) | D⋯A (Å)   | D–H⋯A (°) |
|--------------------------|---------|---------|-----------|-----------|
| O3–H3A⋯O4 <sup>i</sup>   | 0.85(2) | 1.92(2) | 2.7613(9) | 175(2)    |
| O3–H3B⋯N2 <sup>ii</sup>  | 0.83(2) | 2.08(2) | 2.855(1)  | 155(2)    |
| O4–H4A⋯O5 <sup>iii</sup> | 0.90(2) | 1.87(2) | 2.7718(9) | 178(2)    |
| O4–H4B⋯N4 <sup>iv</sup>  | 0.83(2) | 1.98(2) | 2.789(1)  | 166(2)    |
| O5–H5A⋯N3 <sup>iv</sup>  | 0.83(2) | 2.15(2) | 2.905(1)  | 152(2)    |
| O5–H5B⋯O3 <sup>ii</sup>  | 0.92(2) | 1.87(2) | 2.7478(9) | 160(2)    |
| O5–H5B⋯O1 <sup>v</sup>   | 0.92(2) | 2.59(2) | 3.0422(9) | 111(2)    |

Symmetry codes for **1**: (i)  $x, -y+3/2, z+3/2$ ; (ii)  $2-x, -y, 1-z$ ; (iii)  $2-x, -y, -z$ ; (iv)  $1+x, y, z$ ; (v)  $2-x, y-1/2, -z+1/2$

**Table S2.** Strong hydrogen bond geometric parameters for compound **2**.

| D–H⋯A                    | D–H (Å) | H⋯A (Å) | D⋯A (Å)  | D–H⋯A (°) |
|--------------------------|---------|---------|----------|-----------|
| O3–H31⋯N3 <sup>i</sup>   | 0.85(2) | 2.06(2) | 2.872(2) | 159(2)    |
| O4–H41⋯N4 <sup>ii</sup>  | 0.78(2) | 2.14(2) | 2.923(2) | 175(2)    |
| O3–H32⋯O3 <sup>iii</sup> | 0.81(3) | 2.02(3) | 2.833(2) | 176(4)    |
| O4–H42⋯O4 <sup>iv</sup>  | 0.82(3) | 1.94(3) | 2.764(2) | 176(4)    |
| O3–H33⋯O4 <sup>v</sup>   | 0.91(5) | 1.95(5) | 2.799(2) | 153(3)    |
| O4–H43⋯O3 <sup>vi</sup>  | 0.79(5) | 2.07(5) | 2.799(2) | 154(3)    |

Symmetry codes for **2**: (i)  $1+x, 1+y, 1+z$ ; (ii)  $-x-1, -y-1, 1-z$ ; (iii)  $1-x, -y, 2-z$ ; (iv)  $-x-1, -y, 1-z$ ; (v)  $1+x, y, z$ ; (vi)  $x-1, y, z$ .

**Table S3.** Graph-set matrix for strong hydrogen bonding in compound **1**. First level motifs on-diagonal and second level graph-sets off-diagonal (for numbering scheme see Figure 2).

| D–H⋯A                        | A       | B       | C       | D       | E       | F       |
|------------------------------|---------|---------|---------|---------|---------|---------|
| O3–H3A⋯O4 <sup>i</sup> (A)   | D1,1(2) |         |         |         |         |         |
| O4–H4A⋯O5 <sup>iii</sup> (B) | D2,2(4) | D1,1(2) |         |         |         |         |
| O5–H5B⋯O3 <sup>ii</sup> (C)  | D2,2(4) | D2,2(4) | D1,1(2) |         |         |         |
| O3–H3B⋯N2 <sup>ii</sup> (D)  | D2,2(5) |         | D2,2(4) | D1,1(2) |         |         |
| O4–H4B⋯N4 <sup>iv</sup> (E)  | D2,2(4) | D2,2(5) |         | D2,2(5) | D1,1(2) |         |
| O5–H5A⋯N3 <sup>iv</sup> (F)  |         | D2,2(4) | D2,2(5) | D2,2(4) | D2,2(4) | D1,1(2) |

Symmetry codes for **1**: See Table 1.
